# Supplementary material for: In situ electrocatalytic H 2 O 2 synthesis over TiO 2 nanocrystal/porous carbon yolk–shell composites with oxygen functional group modulation
Source: Royal Society of Chemistry journal article supplement (doi:10.1039/d5cc05112f), 2026-01-01
Supplement: d5cc05112f1.pdf [file d5cc05112f1.pdf]

## Supporting Information

# In Situ Electrocatalytic H<sub>2</sub>O<sub>2</sub> Synthesis over TiO<sub>2</sub> Nanocrystal/Porous Carbon Yolk-Shell Composites with Oxygen Functional Group Modulation

Yue Tian<sup>a</sup>, Jie Wang<sup>a,b,\*</sup>, Tianhong Zhou<sup>a</sup>, Shengchun Ma<sup>b</sup>, Yusuke Yamauchi<sup>b,c,\*</sup>

a. Key Laboratory of Integrated Regulation and Resource Development on Shallow Lakes, Ministry of Education, College of Environment, Hohai University, Nanjing 210098, China

b. Australian Institute for Bioengineering and Nanotechnology (AIBN), The University of Queensland, Brisbane, Queensland 4072, Australia

c. Department of Materials Process Engineering, Nagoya University, Furo-chou, Chikusa-ku, Nagoya 464-8601, Japan

*\*Corresponding author.*

E-mail: wang.jie@hhu.edu.cn (J. W.); y.yamauchi@uq.edu.au (Y. Y.)

## Experimental sections

### Synthesis of the samples

Synthesis of yolk-shell TNC/C-X sample: Glycerol ( $\text{C}_3\text{H}_8\text{O}_3$ , 10 mL),  $\text{TiOSO}_4$  (1 mL), and diethyl ether ( $\text{C}_2\text{H}_5\text{OC}_2\text{H}_5$ , 8 mL) were added sequentially to ethanol ( $\text{C}_2\text{H}_5\text{OH}$ , 20 mL) under stirring and stirred for 15 min. The resulting mixture was transferred to a Teflon-lined stainless-steel autoclave and heated at 110 °C for 48 h. After cooling to room temperature, the white precipitate was collected by suction filtration, washed with ethanol three times, and dried at 60 °C overnight. The dried product was then calcined at 1000 °C for 2 h under an Ar atmosphere to obtain TP/C. For acid etching, TP/C (100 mg) was dispersed in  $\text{H}_2\text{SO}_4$  (40 mL) and stirred for 10 min in a 50 mL Teflon liner. The mixture was sealed in a hydrothermal autoclave and heated at 160 °C for 4 h. After cooling, the resulting powder was collected by centrifugation, washed with deionized water three times, and dried at 60 °C for 12 h to yield TNC/C-4. By varying the hydrothermal reaction time (1, 3, or 10 h), the corresponding samples were denoted as TNC/C-1, TNC/C-3, and TNC/C-10, respectively.

Synthesis of the TNC/C-4- $\text{H}_2$ : TNC/C-4 was further annealed at 600 °C for 2 h under 10%  $\text{H}_2$ /Ar atmosphere to obtain the reduced sample, denoted as TNC/C-4- $\text{H}_2$ .

### Characterizations

X-ray diffraction (XRD) patterns were collected on a Rigaku D/Max-2000 diffractometer using Cu  $K\alpha$  radiation ( $\lambda = 1.54 \text{ \AA}$ ). Field-emission scanning electron microscopy (FESEM, HITACH S-4800 SEM) and transmission electron microscopy (TEM, JEM-2100) were used to examine the morphology and microstructure. X-ray photoelectron spectroscopy (XPS) measurement was performed on a Perkin Elmer PH 1500C instrument. Nitrogen adsorption-desorption isotherms were recorded on a Micromeritics TriStar II system at 77 K after degassing the samples at 120 °C for 6 h. The specific surface area was calculated using the Brunauer-Emmett-Teller (BET) method, and the pore size distribution was derived from the adsorption branch using

the Barrett-Joyner-Halenda (BJH) model. Thermogravimetric analysis (TGA) was carried out in air at a heating rate of 10 °C min<sup>-1</sup>. Raman spectra were collected on a Dilor LabRam II system using a 633 nm He-Ne laser.

**Electrochemical measurements:** To prepare the working electrode, 5 mg of electrocatalyst was dispersed in 975 µL of ethanol and 25 µL of Nafion solution (5 wt.%) and sonicated for 1 h to form a homogeneous ink. Then, 10 µL of the ink was drop-cast onto a glassy carbon electrode (geometric area: 0.2475 cm<sup>2</sup>) and dried under ambient conditions. Electrochemical measurements were performed on a CHI760E electrochemical workstation using a three-electrode configuration, with the catalyst-coated glassy carbon electrode as the working electrode, a graphite rod as the counter electrode, and an Ag/AgCl electrode as the reference electrode. Measurements were conducted in 0.1 M KOH or 0.1 M Na<sub>2</sub>SO<sub>4</sub> aqueous solution. Prior to testing, the electrolyte was purged with high-purity O<sub>2</sub> or N<sub>2</sub> for at least 20 min. Cyclic voltammetry (CV) was performed at a scan rate of 50 mV s<sup>-1</sup>. Linear sweep voltammetry (LSV) was recorded at 1600 rpm with a scan rate of 5 mV s<sup>-1</sup>. All potentials were converted to the reversible hydrogen electrode (RHE) scale according to the following equation:

$$E_{RHE} = E_{Ag/AgCl} + 0.197 + 0.059 * pH$$

The H<sub>2</sub>O<sub>2</sub> selectivity and electron-transfer number (n) were determined using a rotating ring disk electrode (RRDE) based on the disk current (*I<sub>D</sub>*) and ring current (*I<sub>R</sub>*). The collection efficiency (N) of the Pt ring was 0.38. The H<sub>2</sub>O<sub>2</sub> selectivity (Sel.) and electron-transfer number (n) were calculated using the following equations:

$$Sel.(%) = 200 * \frac{I_R / N}{I_D + I_R / N}$$

$$n = \frac{4 * I_D}{I_D + I_R / N}$$

**H<sub>2</sub>O<sub>2</sub> Quantification:** The H<sub>2</sub>O<sub>2</sub> concentration was determined by cerium sulfate titration (Ce(SO<sub>4</sub>)<sub>2</sub>). This method is based on the reduction of yellow Ce<sup>4+</sup> to colorless Ce<sup>3+</sup> by H<sub>2</sub>O<sub>2</sub> according to the following reaction:

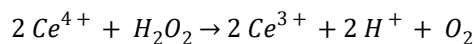

**Phenol Degradation Test:** Electro-Fenton degradation of phenol was carried out in a three-electrode system using a CHI 760E workstation. The catalyst-coated glassy carbon electrode served as the working electrode, with a graphite rod as the counter electrode and an Ag/AgCl as the reference electrode. The electrolyte consisted of 0.1 M Na<sub>2</sub>SO<sub>4</sub> containing 0.2 mM FeSO<sub>4</sub> and phenol at different initial concentrations. The applied potential was set to 0.2 V vs. RHE. A total of 50 mL of electrolyte was added into a 100 mL reaction cell, and the solution was purged with O<sub>2</sub> for 15 min prior to electrolysis. Aliquots were collected immediately after O<sub>2</sub> saturation and again after 10 min of electrolysis. Phenol concentrations were quantified by high-performance liquid chromatography (HPLC), and degradation efficiencies were calculated using a standard calibration curve.

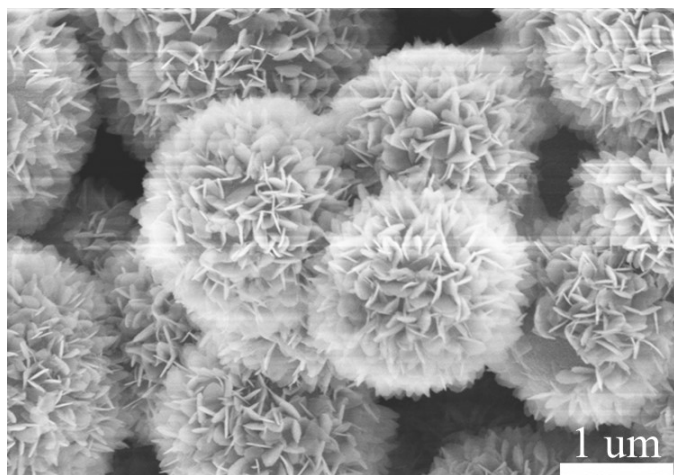

**Figure S1.** SEM image of product from solvothermal reaction.

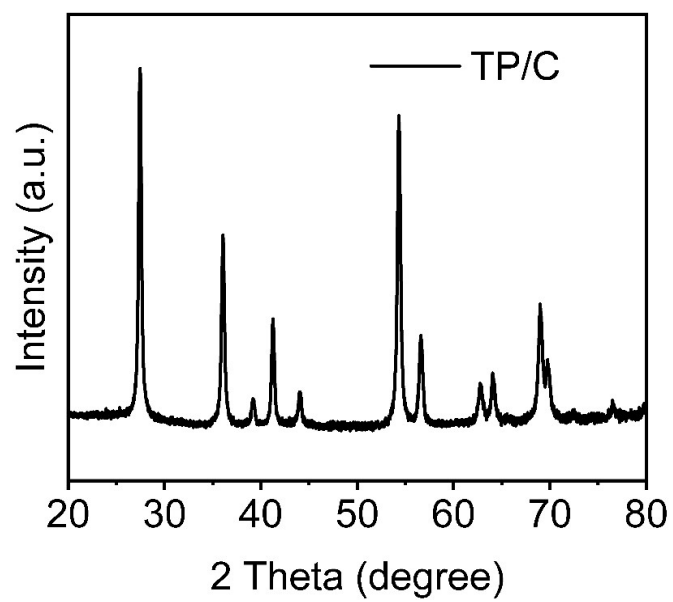

**Figure S2.** XRD pattern of TP/C.

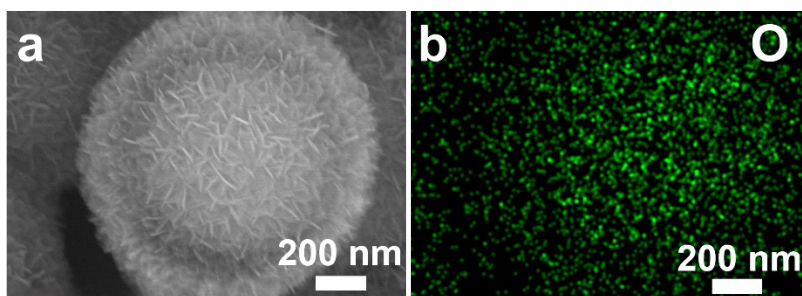

**Figure S3.** (a) SEM image and (b) corresponding elemental mapping of TNC/C-4.

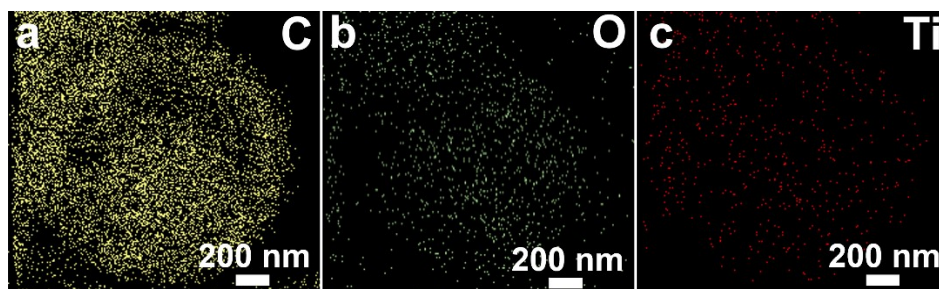

**Figure S4.** (a-c) The TEM-EDS elemental mapping images of TNC/C-4.

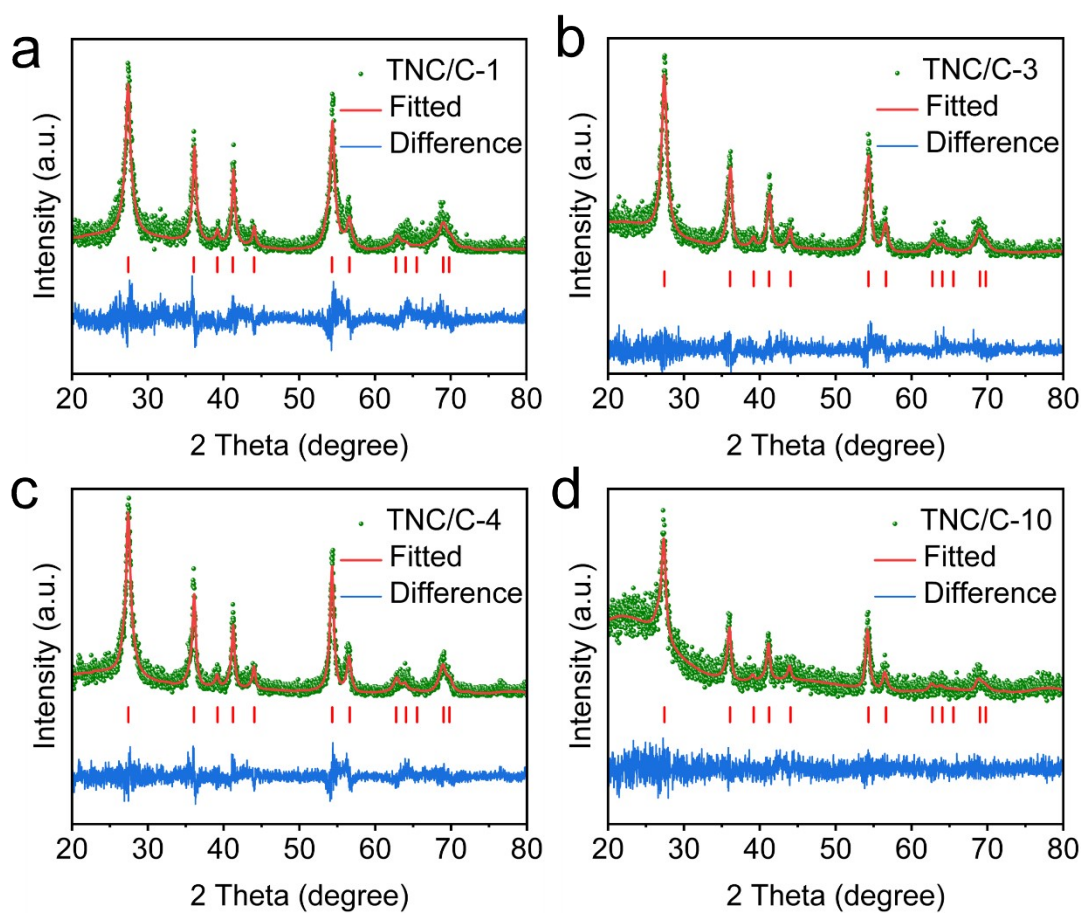

**Figure S5.** (a-d) Rietveld-refined XRD patterns of TNC/C-*X*.

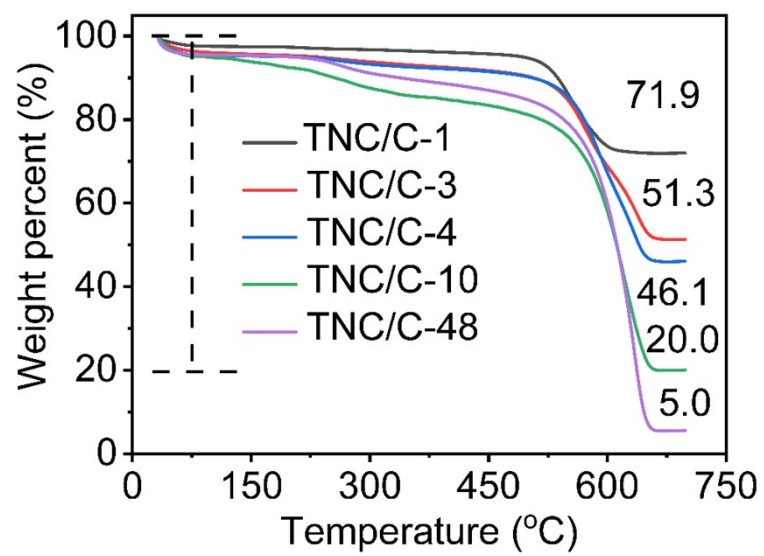

**Figure S6.** TGA curves of TNC/C-*X*.



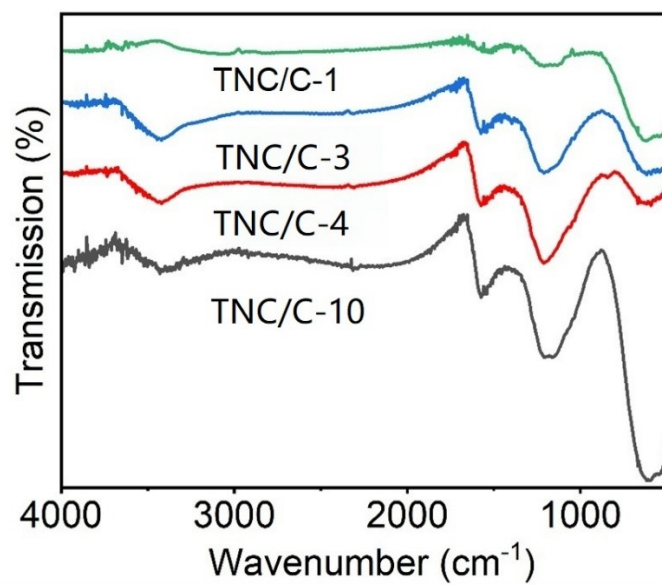

**Figure S7.** FT-IR spectra of TNC/C-*X*.

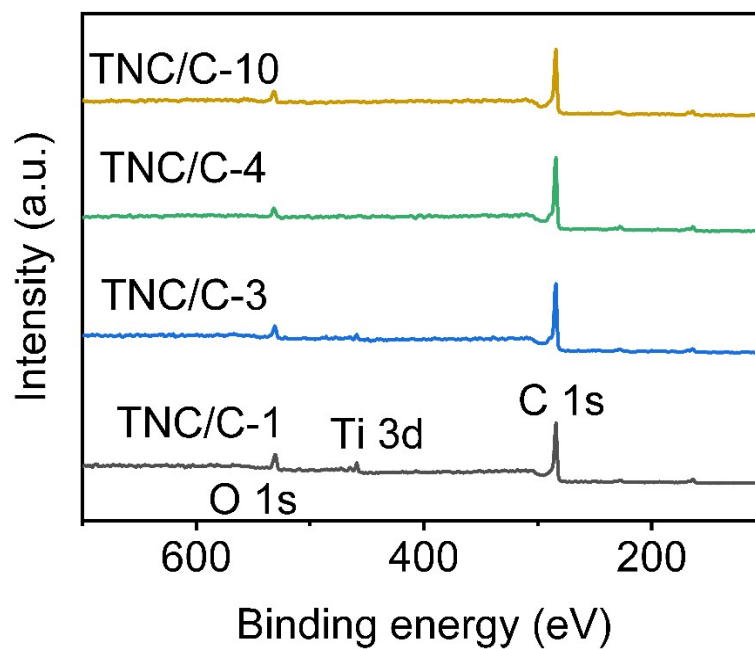

**Figure S8.** XPS survey spectra of TNC/C-*X*.

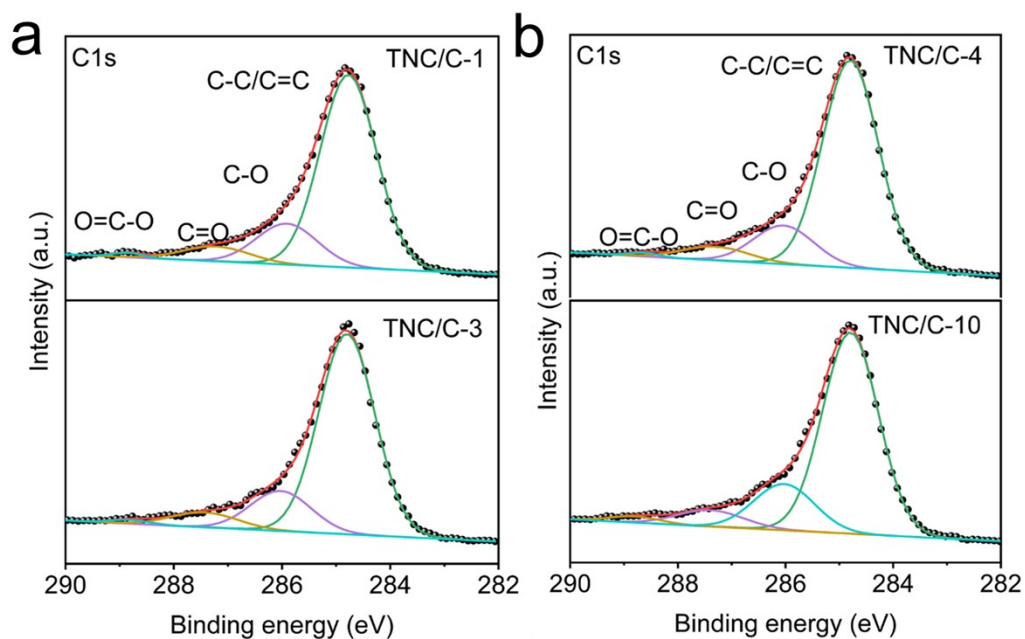

**Figure S9.** High-resolution C 1s XPS spectra of (a) TNC/C-1 and TNC/C-3, (b) TNC/C-4 and TNC/C-10.

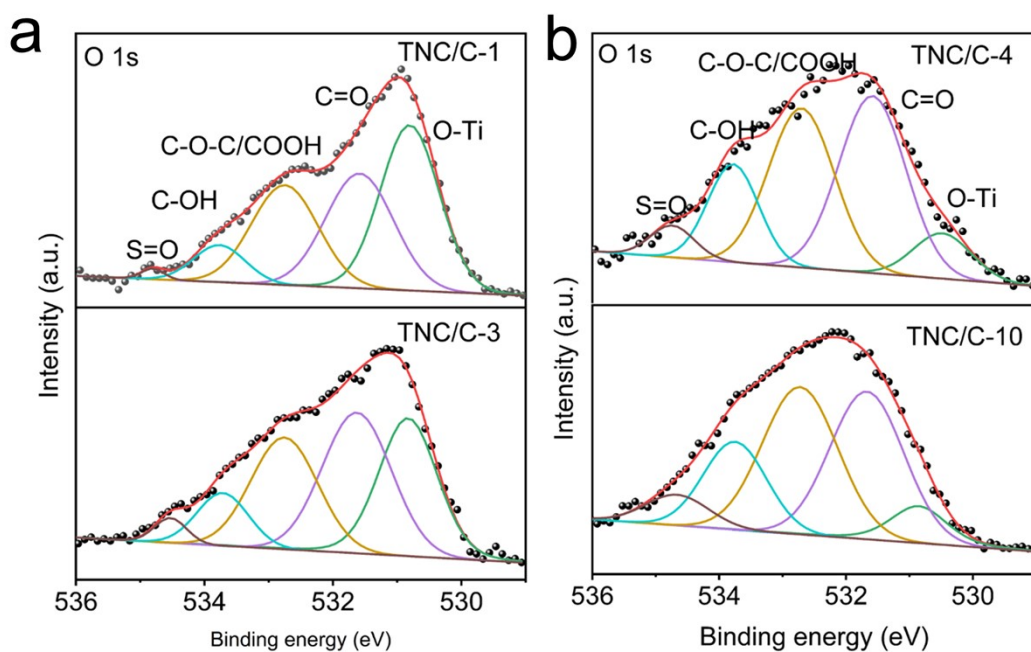

**Figure S10.** High-resolution O 1s XPS spectra of (a) TNC/C-1 and TNC/C-3, (b) TNC/C-4 and TNC/C-10.

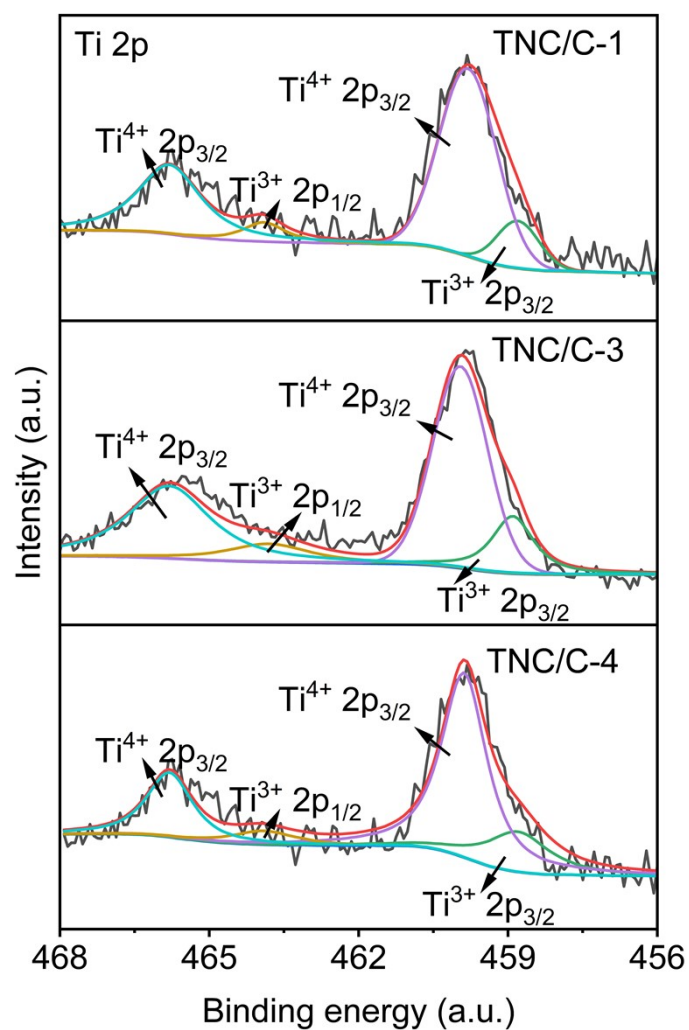

**Figure S11.** High-resolution Ti 2p XPS spectra of TNC/C-*X*.

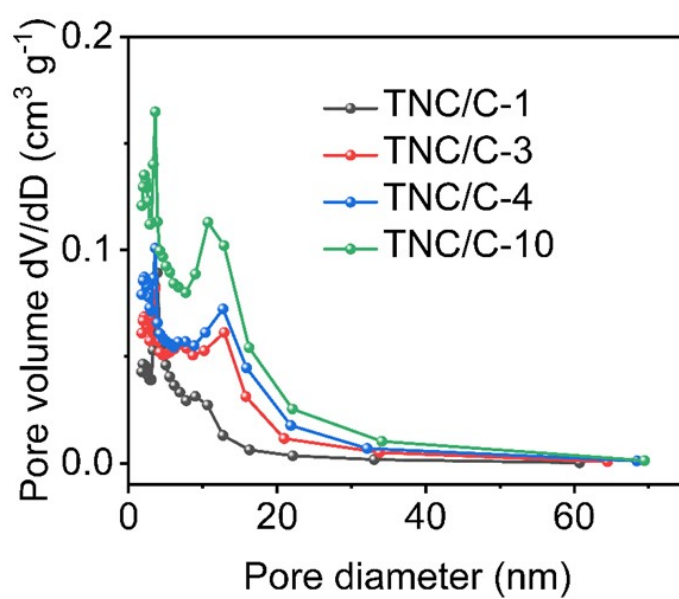

**Figure S12.** Pore size distribution curves of TNC/C-*X*.

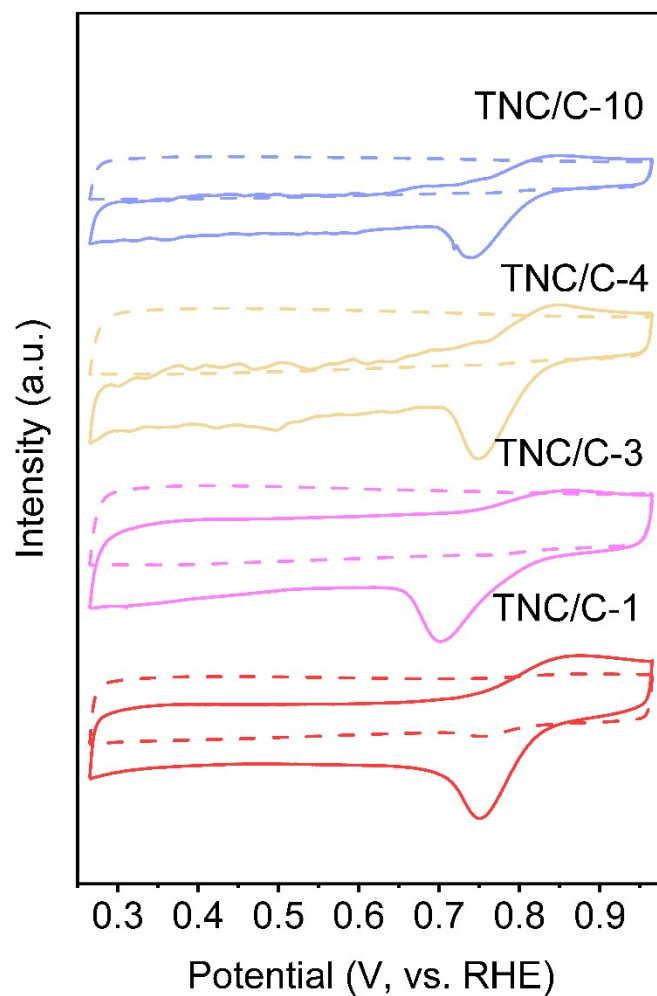

**Figure S13.** CV curves of TNC/C-1, TNC/C-3, TNC/C-4, and TNC/C-10 recorded in N<sub>2</sub>-saturated (dashed lines) and O<sub>2</sub>-saturated (solid lines) 0.1 M KOH at a scan rate of 50 mV s<sup>-1</sup>.

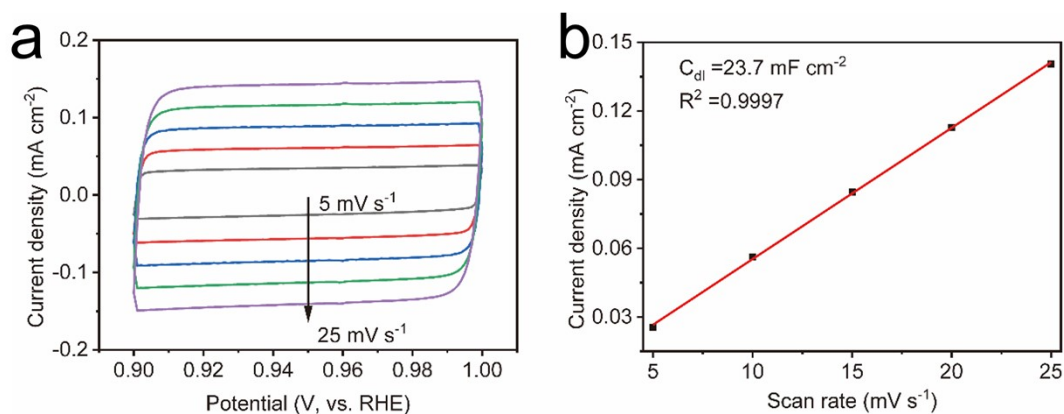

**Figure S14.** (a) CV curves of TNC/C-4 recorded in O<sub>2</sub>-saturated 0.1 M KOH electrolyte at different scan rates. (b) Linear relationship between current density and scan rate used to determine the double-layer capacitance ( $C_{dl}$ ).

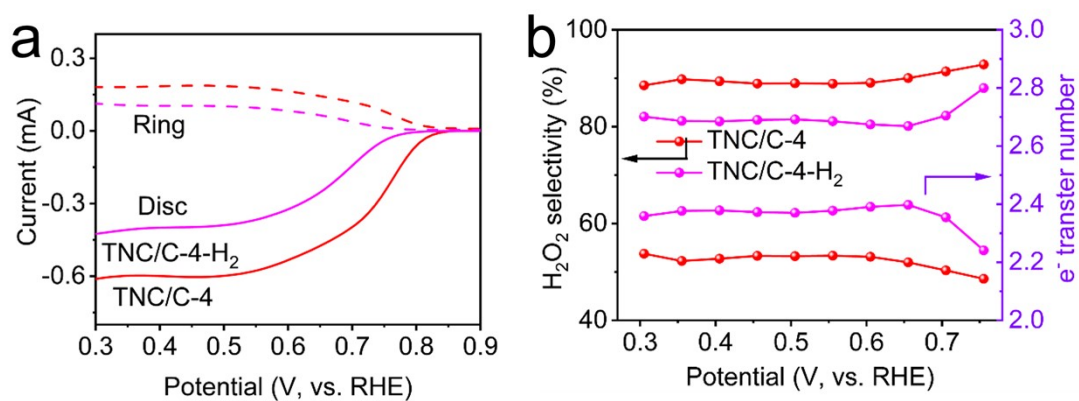

**Figure S15.** (a) RRDE polarization curves recorded at 1600 rpm in O<sub>2</sub>-saturated 0.1 M KOH. (b) Corresponding H<sub>2</sub>O<sub>2</sub> selectivity and electron-transfer number.

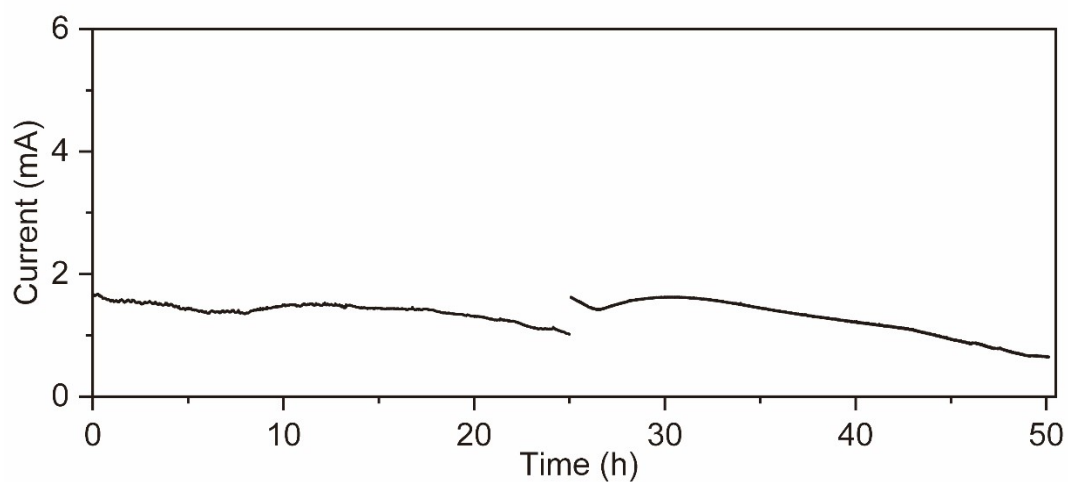

**Figure S16.** Chronoamperometry curve of TNC/C-4 recorded at 0.6 V in the flow cell.

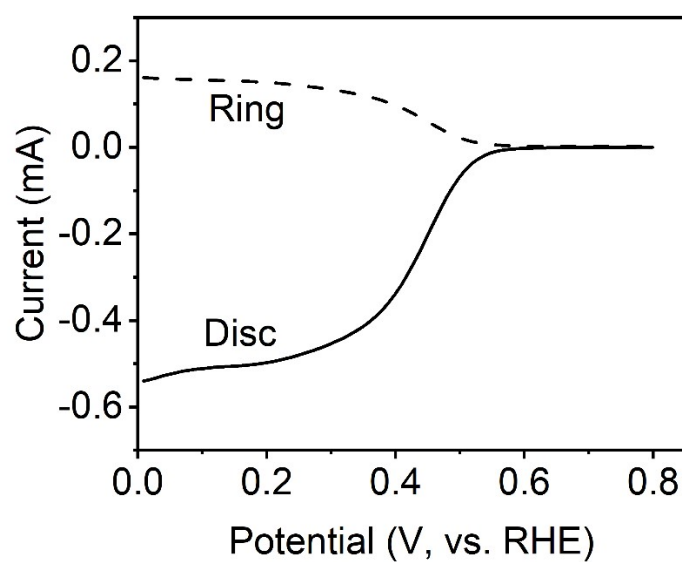

**Figure S17.** RRDE polarization curves of TNC/C-4 recorded at 1600 rpm in O<sub>2</sub>-saturated 0.1 M Na<sub>2</sub>SO<sub>4</sub>.

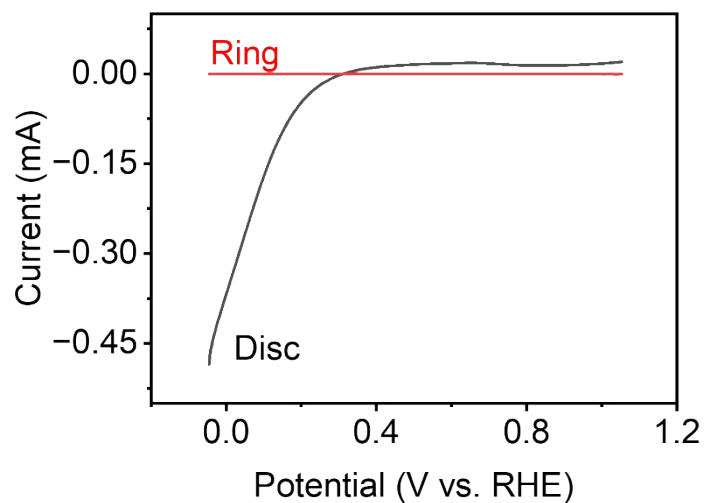

**Figure S18.** RRDE polarization curves recorded at 1600 rpm in O<sub>2</sub>-saturated 0.1 M H<sub>2</sub>SO<sub>4</sub>.

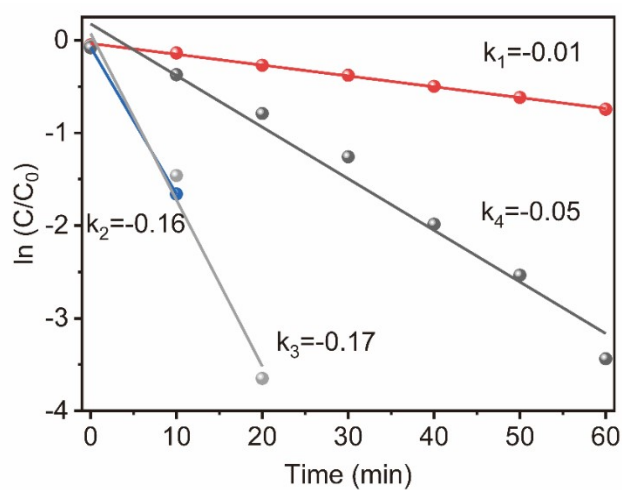

**Figure S19.** Comparison of apparent rate constants ( $k$ ) for phenol degradation over TNC/C-4 under different conditions: 20 ppm without Fe<sup>2+</sup> ( $k_1$ ), 20 ppm electro-Fenton ( $k_2$ ), 50 ppm electro-Fenton ( $k_3$ ), and 200 ppm electro-Fenton ( $k_4$ ).

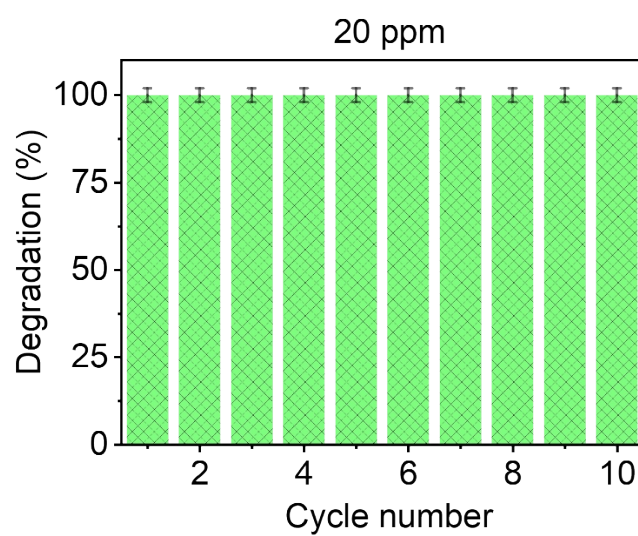

**Figure S20.** Cycling performance of TNC/C-4 for electro-Fenton degradation of 20 ppm phenol.

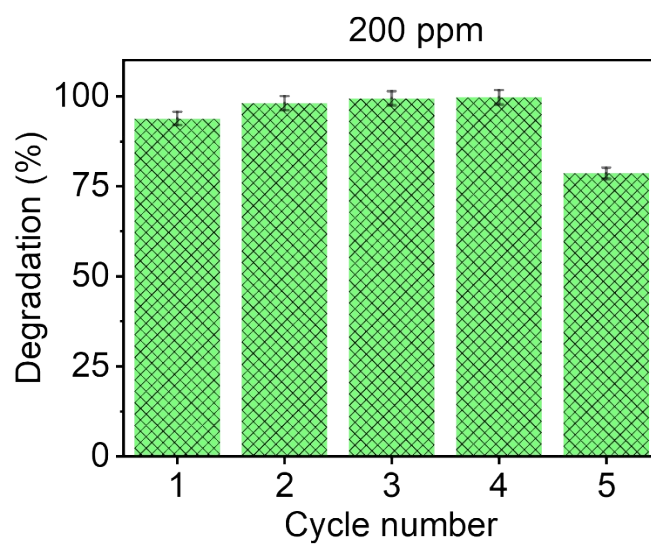

**Figure S21.** Cycling performance of TNC/C-4 for electro-Fenton degradation of 200 ppm phenol.



**Table S1.** Lattice constants of TNC/C-X obtained from Rietveld refinement.

| Sample   | Lattice parameter        |
|----------|--------------------------|
| TNC/C-1  | a=b=4.5925 Å, c=2.9488 Å |
| TNC/C-3  | a=b=4.5929 Å, c=2.9510 Å |
| TNC/C-4  | a=b=4.5968 Å, c=2.9529 Å |
| TNC/C-10 | a=b=4.6040 Å, c=2.9622 Å |

**Table S2.** Specific surface area, pore volume, and pore size parameters of TNC/C-X.

| Sample   | Surface Area<br>(m <sup>2</sup> g <sup>-1</sup> ) | Pore Volume<br>(cm <sup>3</sup> g <sup>-1</sup> ) | Pore Size<br>(nm) |
|----------|---------------------------------------------------|---------------------------------------------------|-------------------|
| TNC/C-1  | 434                                               | 0.76                                              | 7.0               |
| TNC/C-3  | 669                                               | 1.51                                              | 9.0               |
| TNC/C-4  | 794                                               | 1.94                                              | 9.5               |
| TNC/C-10 | 1017                                              | 2.32                                              | 9.6               |

**Table S3.** Comparison of H<sub>2</sub>O<sub>2</sub> production performance in this work and recent reports.

| Electrocatalyst         | Electrolyte | Selectivity (%) | Ref.      |
|-------------------------|-------------|-----------------|-----------|
| TNC/C-4                 | 0.1 M KOH   | 92 (0.7 V)      | Our works |
| S-mC                    | 0.1 M KOH   | 90 (0.7 V)      | 1         |
| P-NMG                   | 0.1 M KOH   | 90 (0.7 V)      | 2         |
| B-C                     | 0.1 M KOH   | 95 (0.6 V)      | 3         |
| G-MrBC                  | 0.1 M KOH   | 95(0.6 V)       | 4         |
| TiO <sub>2-x</sub> /TiC | 0.1 M KOH   | 90 (0.6 V)      | 5         |
| NiO <sub>x</sub>        | 0.1 M KOH   | 91 (0.6 V)      | 6         |
| Au/TiO <sub>2</sub>     | 0.1 M KOH   | 90 (0.5 V)      | 7         |

**Table S4.** ECSA of TNC/C-X estimated from  $C_{dl}$  ( $\text{mF cm}^{-2}$ ).

| Sample | TNC/C-1 | TNC/C-3 | TNC/C-4 | TNC/C-10 |
|--------|---------|---------|---------|----------|
| ECSA   | 9.7     | 22.3    | 23.7    | 16.4     |

**Table S5.** Comparison of phenol degradation performance in electro-Fenton systems reported in previous studies.<sup>[8-14]</sup>

| Electrocatalyst                     | Phenol                                | Removal efficiency | Ref.      |
|-------------------------------------|---------------------------------------|--------------------|-----------|
| TNC/C-4                             | 200 ppm 0.1M $\text{Na}_2\text{SO}_4$ | 1 h 96.8%          | Our works |
| OCNT                                | 20 ppm 1M $\text{Na}_2\text{SO}_4$    | 1 h 99.9 %         | 8         |
| $\text{FeN}_2\text{O}_2\text{-HPC}$ | 20 ppm pH=6.5                         | 0.5 h 99.9 %       | 9         |
| GCN                                 | 10 ppm pH=7                           | 3 h 99.9 %         | 10        |
| AC                                  | 50 ppm pH=3                           | 2 h 100 %          | 11        |
| PC-CNT                              | 10 ppm pH=7                           | 0.5 h 83.5 %       | 12        |
| $\text{TiO}_2\text{-Fe}^{3+}$       | 200 ppm pH=7                          | 1 h 82.48 %        | 13        |
| N-EEGr-GFvv                         | 50 ppm pH=3                           | 0.8 h 91.1 %       | 14        |

## References

1. J. Du, Y. Liu, M. Sun, J. Guan, A. Chen, B. Han, *Angew. Chem. Int. Ed.* 2025, 64, e202503385.
2. L. Han, Y. Wu, K. Fang, S. Sweeney, U. Roesner, M. Parrish, K. Patel, T. Walter, J. Piermattei, A. Trimboli, J. Lefler, C. Timmers, X. Yu, V. Jin, M. Zimmermann, A. Mathison, R. Urrutia, M. Ostrowski, G. Leone, *Nat. Commun.* 2023, 14, 4430.
3. Y. Wu, Y. Zhao, Q. Yuan, H. Sun, A. Wang, K. Sun, G. Waterhouse, Z. Wang, J. Wu, J. Jiang, M. Fan, *Nat. Commun.* 2024, 15, 10843.
4. W. Cui, Z. Zhen, Y. Sun, X. Liu, J. Chen, S. Liu, H. Ren, Y. Lin, M. Wu, Z. Li *Angew. Chem. Int. Ed.* 2025, 64, e202423056.
5. Z. Xu, J. Liang, Y. Wang, K. Dong, X. Shi, Q. Liu, Y. Luo, T. Li, Y. Jia, A. Asiri, Z. Feng, Y. Wang, D. Ma, X. Sun, *ACS Appl. Mater. Interfaces*, 2021, 13, 33182.
6. Z. Wu, T. Wang, J. Zou, Y. Li, C. Zhang, *ACS Catal.* 2022, 12, 5911.
7. Y. He, Y. Wei, Z. Wang, T. Xia, F. Rao, Z. Song, R. Yu. *Adv. Funct. Mater.* 2024, 34, 2314654.
8. G. Zhu, X. Fan, Y. Yu, Y. Liu, X. Quan, *Environ. Sci. Technol.* 2024, 58, 19545.
9. Y. Lu, X. Qin, K. Wang, S. Chen, X. Quan, *Sep. Purif. Technol.* 2023, 320, 124196.
10. Y. Peng, Z. Bian, F. Wang, S. Li, S. Xu, H. Wang, *J. Hazard. Mater.* 2024, 462,

132797.

11. Y. Yang, S. Qiao, J. Zhou, X. Quan, Appl. Catal. B-Environ. 2019, 255, 117772.
12. O. Garcia-Rodriguez, A. Villot, H. Olvera-Vargas, C. Gerente, Y. Andres, O. Lefebvre, Carbon, 2020, 163, 265.
13. M. Haider, W. Jiang, J. Ha, H. Sharif, Y. Ding, H. Cheng, A. Wang, Appl. Catal. B-Environ. 2019, 256, 117774.
14. P. Cao, X. Quan, K. Zhao, S. Chen, H. Yu, J. Niu, J. Hazard. Mater. 2020, 382, 121102.
